# 1                    **A DNA barcode database for the woody plants of Japan**

2    Suzuki Setsuko<sup>1</sup>, Kensuke Yoshimura<sup>1</sup>, Saneyoshi Ueno<sup>1</sup>, James Raymond Peter Worth<sup>1</sup>,  
3    Tokuko Ujino-Ihara<sup>1</sup>, Toshio Katsuki<sup>2</sup>, Shuichi Noshiro<sup>3</sup>, Tomoyuki Fujii<sup>3</sup>, Takahisa Arai<sup>4</sup>,  
4    Hiroshi Yoshimaru<sup>1</sup>

5    <sup>1</sup>Department of Forest Molecular Genetics and Biotechnology, Forestry and Forest Products Research Institute, Forest  
6    Research and Management Organization, Ibaraki, Japan

7    <sup>2</sup>Tama Forest Science Garden, Forestry and Forest Products Research Institute, Forest Research and Management  
8    Organization, Tokyo, Japan

9    <sup>3</sup>Department of Wood Properties and Processing, Forestry and Forest Products Research Institute, Forest Research  
10    and Management Organization, Ibaraki, Japan

11    <sup>4</sup>Tohoku University Botanical Gardens, Tohoku University, Miyagi, Japan

12    Correspondence

13    Suzuki SETSUKO, *Department of Forest Molecular Genetics and Biotechnology, Forestry and Forest Products*  
14    *Research Institute, Forest Research and Management Organization, 1 Matsunosato, Tsukuba, Ibaraki 305-8687,*  
15    *Japan.* E-mail: setsukos@affrc.go.jp

16    Present address

17    Toshio Katsuki, Kyushu Research Center, Kumamoto, Japan

18    Shuichi Noshiro, Center for Obsidian and Lithic Studies, Meiji University, Tokyo, Japan

19    Tomoyuki Fujii, Hiroshi Yoshimaru, Research fellow, Forest Research and Management Organization, Ibaraki,  
20    Japan

21    Takahisa Arai, Kanto Regional Environment Office, Ministry of the Environment, Government of Japan, Saitama,  
22    Japan

23

24 **Abstract**

25 DNA barcode databases are increasingly available for a range of organisms facilitating the wide  
26 application of DNA barcode-based pursuits. Here we announce the development of a  
27 comprehensive DNA barcode database of the Japanese woody flora representing 43 orders, 99  
28 families, 303 genera and 834 species and comprising 77.3% of genera and 72.2% of species of  
29 woody plants in Japan. A total of 6,216 plant specimens were collected from 223 sites  
30 (municipalities, i.e. city, town, village) across the subtropical, temperate, boreal and alpine  
31 biomes in Japan with most species represented by multiple accessions. This database utilised  
32 three chloroplast DNA regions (*rbcL*, *trnH-psbA* and *matK*) and consists of 14,404 barcode  
33 sequences. Individual regions varied in their identification rates with species-level and genus-  
34 level rates for *rbcL*, *trnH-psbA* and *matK* being 57.4%/ 96.2%, 78.5%/ 99.1 % and 67.8%/ 98%,  
35 respectively. Identification rates were higher using region combinations with total species level  
36 rates for two region combinations (*rbcL* & *trnH*, *rbcL* & *matK*, and *trnH-psbA* & *matK*) ranging  
37 between 90.6–95.8%, and for all three regions equal to 98.6%. Genus level identification rates  
38 were even higher ranging between 99.7–100% for two region combinations and being 100% for  
39 the three regions. These results indicate that this DNA barcode database is an effective resource  
40 for investigations of woody plants in Japan using DNA barcodes and provides a useful template  
41 for development of libraries for other components of the Japanese flora.

42 **KEYWORDS**

43 conifers, species discrimination, DNA barcoding, Japan, woody flora, vascular plants

44

45

## 46 **1 | INTRODUCTION**

47 DNA barcodes are short DNA fragments that are able to accurately and rapidly identify to the  
48 lowest taxonomic level possible (ideally to the species level) any unidentified organism  
49 including whole or fragmented specimens, wood, pollen, subfossils or environmental DNA. The  
50 ability to identify plant species via DNA barcoding has a great range of uses including for human  
51 health (such as identifying sources of pollen (Kraaijeveld *et al.*, 2015) or house dust (Craine *et*  
52 *al.*, 2017), in forensics (Ferri *et al.*, 2015), bio-security (Ashfaq & Hebert, 2016), nature  
53 conservation (such as environmental monitoring (Fahner *et al.*, 2016), biodiversity assessment  
54 (Burgess *et al.*, 2011) and enforcing trade laws of endangered species (Dormontt *et al.*, 2015)),  
55 agriculture (e.g. monitoring pollination and gene flow of crops (Richardson *et al.*, 2015) and  
56 various applications for scientific research (e.g. understanding past impacts of climate change  
57 (Giguet-Covex *et al.*, 2014) or for use in plant taxonomy and species discovery (Kress *et al.*,  
58 2015)). Creating DNA barcode libraries, that is, a collection of DNA sequences associated with  
59 specimens that have verified taxonomic identifications (Kress *et al.*, 2015), is essential for use as  
60 a reference in order to identify unidentified samples. DNA barcoding libraries are now available  
61 for a wide range of organisms such as animals and fungi due to the availability of universal  
62 barcodes for these groups. However, unlike animals or fungi, there is no single universal DNA  
63 fragment for use in DNA barcoding of plants mostly due to the low level of mutation of  
64 organelle genomes in plants (Wolfe *et al.*, 1987). This has made it necessary to use multi-locus  
65 barcodes (Kress & Erickson, 2007) and in some cases to develop specific barcodes for the  
66 targeted plant species meaning that the development of DNA barcode libraries for plants is more  
67 complex and time consuming. Nonetheless, in the last decade such libraries have become  
68 available for plants of specific countries or regions (de Vere *et al.*, 2012; Kim *et al.*, 2012),

69 specific taxonomic groups (Liu *et al.*, 2018; Nevill *et al.*, 2013) or individual biomes (Costion *et*  
70 *al.*, 2016; Saarela *et al.*, 2013).

71         Due to the enormous effort required to completely represent the full range of genetic  
72 diversity within species in DNA barcode libraries, especially for those covering many diverse  
73 taxa, the full range of sequence diversity may not be fully captured in DNA barcode libraries.  
74 This factor, together with low sequence divergence between closely related species, which is  
75 particularly common in species rich clades, along with taxonomic uncertainty, means that  
76 reliable identification to species level can be difficult (Parmentier *et al.*, 2013; Raupach *et al.*,  
77 2014). However, for many applications of DNA barcoding assignment to higher taxonomic  
78 levels, such as the genus-level, is of considerable value and, in many plant groups, accuracy of  
79 assignment at this level is more reliable than at the species level (Wilson *et al.*, 2011).

80         In Japan, DNA barcode libraries have been developed for a range of taxonomic groups  
81 (Japanese DNA Barcode Database Committee, 2014). However, these have focussed exclusively  
82 on animals such as birds (Nishiumi, 2012), ticks (Takano *et al.*, 2014), snails (Hirose *et al.*,  
83 2015) and snapping beetles (Oba *et al.*, 2015) with plants, excluding ferns (Ebihara *et al.*, 2010),  
84 so far having been overlooked. The Japanese archipelago has a highly diverse vascular plant  
85 flora with 6,000 species (of which approximately 1,000 are woody plants in ~100 families  
86 (Satake *et al.*, 1989)) of which around 2,900 are endemic (Biodiversity Center of Japan Nature  
87 Conservation Bureau Ministry of the Environment, 2010) and is one of the 35 hotspots of plant  
88 diversity in the world (Mittermeier *et al.*, 2004).

89         In this paper we announce the development of a DNA barcode database for nearly the  
90 entire woody plant flora of Japan (available on the publicly available Barcode of Life Data  
91 System (BOLD: <https://www.boldsystems.org> (Ratnasingham & Hebert, 2007)). This database

92 consists of 6,216 specimens of woody plants (i.e. those plants with above ground perennial parts  
93 having lignified wood formed by secondary growth) sampled from 223 sites across the entire  
94 Japanese Archipelago representing subtropical, temperate, boreal and alpine biomes with  
95 multiple accessions collected across the range of each species where possible (Figure 1). We  
96 utilized three chloroplast regions (*rbcL*, *matK* and *trnH-psbA*) which have become widely used  
97 in plant DNA barcoding studies and have achieved high rates of species resolution (Burgess *et*  
98 *al.*, 2011; Kress *et al.*, 2009).

99

## 100 **2 | MATERIALS AND METHODS**

### 101 2.1 | Laboratory Work

102 Leaf samples for DNA extraction were collected from 223 sites across the whole of the Japanese  
103 Archipelago (Figure 1). These sites encompass all major vegetation types and biomes of Japan.  
104 For each sample, the latitude and longitude were recorded and identification was done to the  
105 lowest taxonomic level possible (i.e. subspecies or variety). For 92.4 % of samples, voucher  
106 herbarium specimens were prepared and stored in the herbaria in Japan. Most of them are housed  
107 in the xylarium (TWTw) and herbarium (TF) of the Forestry and Forest Products Research  
108 Institute (FFPRI), and most images of these voucher herbarium specimens are available at the  
109 database of Japanese Woods, FFPRI (<https://db.ffpri.go.jp/WoodDB/index-E.html>) and BOLD  
110 SYSTEMS. The rest vouchers of the samples are housed in the herbaria of Tohoku University  
111 Botanical Garden herbarium (TUS) and Herbarium of the Kyushu University Museum (FU) in  
112 Japan (Specimen details including museum ID together with GenBank ID and BOLD process ID  
113 is available from Supplementary table 1 and BOLD SYSTEMS).

114 DNA was extracted using DNeasy Plant Mini Kit (Qiagen) following the manufacturer's  
115 instructions. For each sample we aimed to sequence three chloroplast barcode regions (rbcL,  
116 matK and trnH-psbA). The rbcL gene is easily amplified across land plants and, although it does  
117 not have sufficient variability to be used alone as a species discriminator, is considered a reliable  
118 'benchmark' locus for placing taxa into family and genera (Kress & Erickson, 2007). matK is  
119 one of the most variable coding regions found in chloroplast DNA (Shaw *et al.*, 2005), while the  
120 non-coding trnH-psbA region has highly conserved priming sites across land plants and high  
121 sequence divergence (Kress & Erickson, 2007). The first two of these fragments, rbcL and matK,  
122 have been adopted by the Consortium for the Barcode of Life (CBOL) (CBOL Plant Working  
123 Group, 2009) as the core 2-locus barcode for plants while trnH-psbA has been widely used as a  
124 single locus or in combination with other loci (Pang *et al.*, 2012; Yao *et al.*, 2009). To amplify  
125 the barcode regions (rbcL, matK and trnH-psbA) we first tested primers recommended by the  
126 CBOL Plant Working Group (CBOL Plant Working Group, 2009; Hamilton, 1999). However,  
127 due to poor amplification and sequence quality, new primers to amplify both rbcL (reverse only)  
128 trnH-psbA (both forward and reverse) regions were designed by consulting the whole chloroplast  
129 genomes of tobacco, rice and Japanese black pine (Table 1). For the matK region, we also  
130 designed a new reverse primer by consulting the matK sequence of *Hydrangea macrophylla*, and  
131 trialled a two-step PCR approach following Forrest *et al.* (2011) with separate primer pairs for  
132 each step (Table 1). However, due to poor amplification success of matK in some orders or, in  
133 some cases, families, we developed new targeted primers. For those orders and/or families,  
134 where amplification of matK was poor we downloaded available chloroplast sequences from  
135 Genbank and developed new targeted primers (Table 1).

136 The PCR reaction mixture contained 0.05  $\mu\text{l}$  Ex Taq polymerase (5 U/ $\mu\text{l}$ , TAKARA), 1  $\mu\text{l}$   
137 10X Ex Taq Buffer (20 mM,  $\text{Mg}^{2+}$  plus), 0.8  $\mu\text{l}$  dNTP Mixture (2.5 mM each), 0.5  $\mu\text{l}$  forward  
138 and reverse primer (each 2  $\mu\text{M}$ ), and 2  $\mu\text{l}$  template DNA (approximately 10 ng) in 10  $\mu\text{l}$  total  
139 volume. PCRs were carried out using the following thermocycle: 94  $^{\circ}\text{C}$  for 3 min, then 35 cycles  
140 of 94  $^{\circ}\text{C}$  for 30s, each annealing temperature for 60s, 72  $^{\circ}\text{C}$  for 90s, followed by final extension  
141 at 72  $^{\circ}\text{C}$  for 10 min. Amplicon products were sent to TAKARA Bio (Mie, Japan) and Hokkaido  
142 System Science (Sapporo, Japan) for DNA sequencing or, alternatively, sequenced using an  
143 ABI3100 Genetic Analyzer (Applied Biosystems) at the FFPRI, Tsukuba, Ibaraki Prefecture. We  
144 used not only KB Basecaller (Applied Biosystems) but also PeakTrace software (Nucleics) for  
145 accurate base calling in some sequences. Sequences for *rbcL* and *trnH* were checked by eye  
146 using Sequencher (Hitachi) and aligned in Bioedit (Hall 1994). Those for *matK* were checked  
147 and aligned by CodonCode Aligner (CodonCode Corporation, [www.codoncode.com](http://www.codoncode.com)).

148

## 149 2.2 | Data analysis

150 Firstly, in order to grasp how well the database represents the total native woody plants of Japan  
151 we calculated the percentage of genera and species native to Japan included in the database per  
152 family using the most comprehensive reference available (The wild woody plants of Japan  
153 volumes I and II; Satake *et al.* 1989). In addition, we calculated the proportion of the flora  
154 included in the database for each of six regions of Japan (Hokkaido, Honshu, Shikoku, Kyushu,  
155 Nansei and Ogasawara Islands) with the distribution of each species based on Satake *et al.*  
156 (1989). Where new additions or changes to the woody plants have been made that are not listed  
157 in Satake *et al.* (1989) these were not taken into account in the calculations. For woody plants  
158 not listed in Satake *et al.* (1989), we included as many as possible from the 223 sites and

159 included them in the database. For taxonomic classifications we followed the most recent  
160 available (Green List (Ito *et al.*, 2016) or, for those not listed on Green List, we followed YList  
161 (Yonekura & Kajita, 2003)). The taxonomic classification used for BOLD is shown in  
162 Supplementary table 1. Any disagreement in classification at the order or family level between  
163 Green List and/or YList is also indicated.

164         The success rate of sequencing was calculated as the proportion of the number of high-  
165 quality sequences obtained to the total number of samples. The species identification ability of  
166 each barcode was evaluated using the BLAST method (Altschul *et al.*, 1990). BLAST databases  
167 were constructed not only for each region (rbcL, matK and trnH-psbA), but also combined  
168 regions (rbcL & matK, matK & trnH-psbA, trnH-psbA & rbcL, and all three regions). Sequences  
169 were concatenated and used in the BLAST databases if sequences were available. Nucleotide  
170 BLAST (blastn) search was carried out for each sequence in each database against its own  
171 database (i.e. a self-blast) with default parameters. If the top hit sequence species name was the  
172 same as that of the query sequence and was the highest BLAST hit score, we considered the  
173 query sequence was successfully identified at the species level. However, if multiple top BLAST  
174 hits had the same score, the query was considered to not be identifiable to the species level. In  
175 the case that the multiple top BLAST hits contained only sequences of the same genus or family  
176 as that of query sequence, it was considered to be identified at genus or family level,  
177 respectively.

178

179 2.3 | Phylogenetic analyses



180 To confirm the consistency of the data we constructed, a phylogenetic tree based on the three  
181 region barcode sequences of angiosperms included in the Japanese woody plant database and  
182 compared the result to published angiosperm phylogenies (The Angiosperm Phylogeny Group,  
183 2003, 2009, 2016). To do so, for each angiosperm family one representative individual sample  
184 with the longest concatenated sequence of the three regions was selected. Sequence alignment  
185 was undertaken in Geneious version 2019.0.4 using Muscle alignment (Edgar, 2004) with  
186 default parameters. Phylogenetic analysis was undertaken using a Bayesian MCMC approach  
187 implemented in MrBayes v 3.2 (Ronquist *et al.*, 2012) and run with 400,000 MCMC generations,  
188 4 chains and sample frequency of 100 and implementing the most parameter-rich substitution  
189 model, GTR+I+G, which has been shown to perform equally well as specifically selected  
190 models (Abadi *et al.*, 2019). A sequence of the basal angiosperm family Schisandraceae  
191 (Austrobaileyales) was selected as an outgroup (The Angiosperm Phylogeny Group, 2003, 2009,  
192 2016). A consensus tree was produced using the `sumt burnin=0.25` command and was then  
193 edited in FigTree v1.4.4 (Rambaut, 2020).

194

### 195 3 | RESULTS

196 In total, 14,404 barcode sequences from 6,216 woody plant specimens were included in the  
197 database (Table 2). The average number of accessions per species was 7.5 and ranged from a  
198 single accession to a maximum of 73. Our database included 43 orders, 99 families, 303 genera,  
199 834 species with 953 taxa which represented 77.3% of woody plant genera and 72.2% of woody  
200 plant species recognised by Satake *et al.* (1989). The missing species included those that are rare  
201 or have restricted ranges on islands, high mountain tops or serpentine regions or were otherwise

202 not encountered at the 223 collection sites. The sampling rate for each geographic region ranged  
203 between 84.3–88.9% except for the Nansei Islands (63.3%, Table 3).

204 The total sequence success for *rbcL*, *trnH-psbA* and *matK* were 96.2, 76.4 and 59.1%,  
205 respectively (Figure 2a). We obtained *rbcL* for all orders sampled while *trnH-psbA* did not  
206 amplify in one order (Araucariales, Figure 3a). The amplification of *matK* had been lower  
207 (45.0%) with no amplification in 14 orders consisting of 17 families including all gymnosperms  
208 when we used a two-step PCR approach (data not shown). However, the use of newly developed  
209 targeted primers (Table 1) resulted in the number of orders where *matK* was not amplifiable  
210 decreasing from 14 to 4 consisting of 10 families, and showed high sequence success rate in  
211 gymnosperms (Figure 3a, Supplementary table 2, 3).

212 Total identification rates for *rbcL* were as follows: 57.4% of samples returned a species  
213 level match, 96.2% a genus level match and 100% a family level match (Figure 2b). For *trnH-*  
214 *psbA*, there was greater identification rate with 78.5% returning a species level match, 99.1 % at  
215 genus level and 100% at the family level. For *matK* the identification rates were middle range  
216 with 67.8% returning a species level match, 98.1% at the genus level and 100% at the family  
217 level. Total identification rate at species level for two region combinations (*rbcL* & *trnH*, *rbcL* &  
218 *matK*, and *trnH-psbA* & *matK*) ranged between 90.6–95.8%, and for all three regions was  
219 98.6%. Total identification rate at genus level for two region combinations (*rbcL* & *trnH-psbA*,  
220 *rbcL* & *matK*, and *trnH-psbA* & *matK*) ranged between 99.7–100%, and for three regions was  
221 100 %.

222 There were some similar taxonomic patterns across the three regions for identification  
223 rate (Figure 3b). Some species rich orders had a tendency for low species level identification rate  
224 based on the individual regions such as Pinales, Pandanales, Rosales and Fagales. The lowest

225 order-based identification rate for each region was 33.3% for *rbcL*, 50.0% for *trnH* (both  
226 *Pandanales*) and 40.5% for *matK* (*Pinales*) (Supplementary table 3). For 18 families that were  
227 well sampled and sequenced (i.e. over 70% of species represented and over 50% of sequence  
228 success for all three regions) and have relatively high species diversity (over 10), we found that  
229 identification rate at the species level was high using all three regions combined (Figure 4). Only  
230 two families had identification rate below 95% (*Pinaceae*=91.8% and *Rosaceae*=93.5%).  
231 Interestingly, despite low species-level identification rates based on each individual region  
232 (25.7–66.0%), the combined data resulted in a 99.2% successful identification rate for *Fagaceae*  
233 (Figure 4). High identification rates at each individual region of 85.4–97.8% were observed in  
234 *Rutaceae*. The identification rates at the family, genus and species levels for all families is  
235 provided in Supplementary table 3.

236 The phylogenetic tree of Japanese native angiosperm woody plants was well resolved  
237 with most nodes having branch-support values over 95%. In addition, the phylogenetic tree has  
238 similar overall relationships to published angiosperm phylogenies (Figure 5) (The Angiosperm  
239 Phylogeny Group, 2003, 2009, 2016).

240

#### 241 4 | DISCUSSION

242 This barcode database of Japanese woody plants provides a valuable resource for a range of  
243 applications in scientific, government and commercial pursuits. The high representation of  
244 woody plant species and multiple accessions per species make it one of the most comprehensive  
245 barcode libraries of any taxonomic group in the country to date. This database is significant  
246 advancement in terms of the barcode resources available for the Japanese flora with the only

247 previous barcode database being for ferns (Ebihara *et al.*, 2010). For well sampled families the  
248 species identification rate achieved using all three barcodes was high (over 90%). The database  
249 can be accessed and samples analysed directly at the Barcode of Life Data System website  
250 (BOLD: Ratnasingham & Hebert (2007)), GenBank and ForestGEN  
251 (<https://forestgen.ffpri.go.jp/jp/index.html>) or alternatively, data exported and analysed in other  
252 programs (e.g. Sonet *et al.*, 2013; Steinke *et al.*, 2005; Vences *et al.*, 2021). In the case that an  
253 unknown samples sequence is not included in the database identification to the nearest species  
254 and/or genus is likely to be accurate. Identification accuracy of unknown samples may be  
255 improved by utilising specific programs that take into account identification uncertainty due to  
256 incomplete sampling of sequence diversity (Sonet *et al.*, 2013).

257         Based on this database, the utility of each individual region differed substantially. *rbcL*  
258 had the highest sequence success rate but the lowest species-level identification rate. *matK* had  
259 the lowest sequence success rate and moderate species-level identification rate. In contrast, *trnH*-  
260 *psbA* had moderate sequencing success but the highest species-level identification rate. The  
261 CBOL Plant Working Group recommend the *rbcL* and *matK* combination as a standard barcode  
262 for land plants with *trnH*-*psbA* not included due to alignment issues caused by high variability  
263 including at mononucleotide repeats. However, if the application of barcodes is focussed at the  
264 family or genus level *trnH*-*psbA* is useful for species level identification given its high  
265 variability. On the hand, the *rbcL* and *matK* pair is more appropriate than *trnH*-*psbA* for  
266 revealing phylogenetic relationships across a diverse range of taxonomic groups. Lastly, we  
267 show that for orders where PCR amplification using universal primers was poor the development  
268 of targeted primers can significantly improve results. This was especially evident in  
269 gymnosperms and Sapindales where improvements of up to 100% were observed for *matK*

270 (Supplementary table 2). This finding suggests that for reliable use of matK in DNA barcode  
271 libraries the development of targeted primers may be necessary.

272         The lowest species level identification rates based on individual regions were observed in  
273 Pinales, Pandanales, Rosales and Fagales. Rosales and Fagales have high species diversity but  
274 are also characterised by families where recurrent past or ongoing gene flow via hybridisation  
275 and/or hybrid species is widespread in Japan (Iwatsuki *et al.*, 1999, 2001, 2006). In contrast,  
276 Pinales have lower number of species but undergo extensive chloroplast sharing resulting in a  
277 lower identification rate in some genera (Aizawa & Iwaizumi, 2020; Watano *et al.*, 2004).  
278 Similar identification rates have been observed in European *Pinus* (Celiński *et al.*, 2017).  
279 Hybridisation between congeneric species can lead to chloroplast haplotype sharing (McKinnon  
280 *et al.*, 1999; Petit *et al.*, 2002) which in some cases makes species level identification difficult or  
281 even impossible, especially using a single chloroplast-based barcode. However, despite this even  
282 for orders with low species level identification rates based on individual regions such as Pinales,  
283 Rosales and Fagales, identification rates were over 90% using all three regions. Another reason  
284 for low species level identification rates observed in this study is exemplified by the genus  
285 *Pandanus* whose two Japanese species occur on separate islands but due to very recent  
286 speciation have not diverged at the chloroplast.

287         The availability of the Japanese woody plant barcode database is likely to open new  
288 avenues for scientific research and environmental monitoring in Japan. DNA Barcodes combined  
289 with NGS technology have already formed the basis of new, powerful and less invasive  
290 approaches to environmental monitoring in other organisms. For example, DNA barcodes for  
291 fish species used in metabarcoding of environmental DNA from seawater samples has the  
292 potential to revolutionize management of fish resources in Japan (Miya *et al.*, 2015) by

293 improving the accuracy of assessments of fish species diversity (Yamamoto *et al.*, 2017) and  
294 providing a new tool to assess fish species biomass (Yamamoto *et al.*, 2016). Some research  
295 fields where DNA barcodes for Japanese woody plants may have significant impact, either as the  
296 sole investigative tool or together with existing methods, includes assessing present diversity of  
297 plants in biodiversity surveys (Taberlet *et al.*, 2012; Yoccoz *et al.*, 2012), diet analysis of  
298 endangered or invasive animals (Ando *et al.*, 2013; Nakahama *et al.*, 2021), or monitoring of  
299 pollen sources (Nakazawa *et al.*, 2013). The database could also have applications aimed at  
300 surveying past plant diversity from the decade to potentially thousands of years scale. For  
301 example, DNA metabarcoding could be a useful tool in deciphering the plant species  
302 composition of natural vegetation before conversion to plantations in the mid-late 20<sup>th</sup> century.  
303 Reconversion to native forest and grasslands of some areas of under-exploited plantations in  
304 Japan has been an important issue in the last decade (Yamaura *et al.*, 2012) but given that  
305 plantation forests can cover large areas, with up to 66% of totals forest area in parts of  
306 southwestern Japan being planted forests (Forestry Agency, 2017), understanding past natural  
307 vegetation can be difficult. Chloroplast DNA barcodes are highly suited to investigations using  
308 degraded samples, including ancient DNA, because of the high copy number of chloroplast in  
309 plant cells (Wagner, 1992). However, given that shorter DNA fragments survive for longer  
310 (Deiner *et al.*, 2017), optimization of shorter targeted fragments of the three barcodes would  
311 most likely be required.

312         The barcode database for Japanese woody plants announced in this paper provides a  
313 valuable resource for both research and non-research-based pursuits investigating the countries  
314 flora. Due to the high species diversity and high number of geographically restricted species  
315 constructing a barcode database for the entire Japanese flora was not considered feasible in one

316 study. However, we hope that this study provides a useful template from which further country-  
317 or region-based databases can be developed including for herbaceous plants and rare species that  
318 were not targeted in this study. For this database the use of nuclear loci such as the internal  
319 transcribed spacer (ITS) was not considered because of poor amplification success across land  
320 plants (Hollingsworth, 2011) and paralogous copies (Poczai & Hyvönen, 2010). However,  
321 future studies, especially those focussed on specific taxonomic groups, could have success using  
322 the shorter ITS2 region (China Plant B. O. L. Group *et al.*, 2011), or potentially other low copy  
323 nuclear loci (Kurian *et al.*, 2020).

324

## 325 **ACKNOWLEDGEMENTS**

326 We would like to thank Y. Tsumura, T. Kawahara, M. Ohtani (FFPRI), M. Ito (The University of  
327 Tokyo) and H. Tachida (Kyushu University) for their valuable advice. We also thank, K. Ishida  
328 (Hirosaki University), H. Sakio, M. Nakata (Niigata University), N. Matsushita (The University  
329 of Tokyo), Y. Mukai, Shogo Kato (Gifu University), I. Tamaki, N. Yanagisawa (Gifu Academy  
330 of Forest Science and Culture), Y. Watanabe (Nagoya University), H. Kisanuki (Mie  
331 University), H. Ando, M. Yamazaki, S. Sakaguchi (Kyoto University), T. Yahara (Kyushu  
332 University), M. Takagi (University of Miyazaki), H. Taoda, K. Sugai, Shuri Kato, S. Kikuchi  
333 and T. Nagamitsu (FFPRI) for collecting samples and Y. Kawamata, A. Hisamatsu and C.  
334 Furusawa (FFPRI) for their assistance with laboratory work. This work was supported by a  
335 Grant-in-Aid for Scientific Research (20248017, 25292098) from the Japan Society for the  
336 Promotion of Science, and the support program of FFPRI for researchers having family  
337 responsibilities.

338

339 **AUTHOR CONTRIBUTIONS**

340 Hiroshi Yoshimaru, Kensuke Yoshimura and Suzuki Setsuko conceived and designed the  
341 research. Toshio Katsuki, Shuichi Noshiro, Tomoyuki Fujii and Takahisa Arai conducted the  
342 field work. Hiroshi Yoshimaru, Kensuke Yoshimura, Takahisa Arai and Suzuki Setsuko  
343 conducted the laboratory work. Hiroshi Yoshimaru, Kensuke Yoshimura, Saneyoshi Ueno,  
344 James Raymond Peter Worth, Tokuko Ujino-Ihara and Suzuki Setsuko analyzed the data. James  
345 Raymond Peter Worth, Saneyoshi Ueno and Suzuki Setsuko wrote the manuscript. All authors  
346 contributed to the final submitted manuscript.

347

348 **DATA AVAILABILITY STATEMENT**

349 Specimen data and DNA barcodes: BOLD and Genbank accessions are listed with specimen  
350 metadata in supporting information.

351

352 **ORCID**

353 Suzuki Setsuko: <https://orcid.org/0000-0002-0612-1853>

354 Saneyoshi Ueno: <https://orcid.org/0000-0001-5571-0622>

355 James Raymond Peter Worth: <https://orcid.org/0000-0003-2020-2470>

356 Tokuko Ujino-Ihara: <https://orcid.org/0000-0002-9243-1638>

357 Tomoyuki Fujii: <https://orcid.org/0000-0002-6552-5639>



358 Hiroshi Yoshimaru: <https://orcid.org/0000-0002-0688-5589>

359

360 **REFERENCES**

- 361 Abadi S, Azouri D, Pupko T, Mayrose I (2019) Model selection may not be a mandatory step for phylogeny  
362 reconstruction. *Nature communications*, **10**(1), 934.
- 363 Aizawa M, Iwaizumi MG (2020) Natural hybridization and introgression of *Abies firma* and *Abies homolepis* along  
364 the altitudinal gradient and genetic insights into the origin of *Abies umbellata*. *Plant Species Biology*, **35**(2),  
365 147-157.
- 366 Altschul SF, Gish W, Miller W, Myers EW, Lipman DJ (1990) Basic local alignment search tool. *J Mol Biol*,  
367 **215**(3), 403-410.
- 368 Ando H, Setsuko S, Horikoshi K, *et al.* (2013) Diet analysis by next-generation sequencing indicates the frequent  
369 consumption of introduced plants by the critically endangered red-headed wood pigeon (*Columba janthina*  
370 *nitens*) in oceanic island habitats. *Ecol Evol*, **3**(12), 4057-4069.
- 371 Ashfaq M, Hebert PDN (2016) DNA barcodes for bio-surveillance: regulated and economically important arthropod  
372 plant pests. *Genome*, **59**(11), 933-945.
- 373 Biodiversity Center of Japan Nature Conservation Bureau Ministry of the Environment (2010) *Biodiversity of*  
374 *Japan : a harmonious coexistence between nature and humankind*. Tokyo: Heibonsha.
- 375 Burgess KS, Fazekas AJ, Kesanakurti PR, *et al.* (2011) Discriminating plant species in a local temperate flora using  
376 the rbcL+ matK DNA barcode. *Methods in Ecology and Evolution*, **2**(4), 333-340.
- 377 CBOL Plant Working Group (2009) A DNA barcode for land plants. *Proc Natl Acad Sci U S A*, **106**(31), 12794-  
378 12797.
- 379 Celiński K, Kijak H, Wojnicka-Póltorak A, *et al.* (2017) Effectiveness of the DNA barcoding approach for closely  
380 related conifers discrimination: A case study of the *Pinus mugo* complex. *Comptes Rendus Biologies*,  
381 **340**(6), 339-348.
- 382 China Plant B. O. L. Group, Li D-Z, Gao L-M, *et al.* (2011) Comparative analysis of a large dataset indicates that  
383 internal transcribed spacer (ITS) should be incorporated into the core barcode for seed plants. *Proceedings*  
384 *of the National Academy of Sciences*, **108**(49), 19641-19646.
- 385 Costion CM, Lowe AJ, Rossetto M, *et al.* (2016) Building a plant DNA barcode reference library for a diverse  
386 tropical Flora: an example from Queensland, Australia. *Diversity*, **8**(1), 5-5.
- 387 Craine JM, Barberán A, Lynch RC, *et al.* (2017) Molecular analysis of environmental plant DNA in house dust  
388 across the United States. *Aerobiologia*, **33**(1), 71-86.
- 389 de Vere N, Rich TCG, Ford CR, *et al.* (2012) DNA barcoding the native flowering plants and conifers of Wales.  
390 *PLoS One*, **7**(6).
- 391 Deiner K, Bik HM, Mächler E, *et al.* (2017) Environmental DNA metabarcoding: Transforming how we survey  
392 animal and plant communities. *Molecular ecology*, **26**(21), 5872-5895.
- 393 Dormontt EE, Boner M, Braun B, *et al.* (2015) Forensic timber identification: It's time to integrate disciplines to  
394 combat illegal logging. *Biological Conservation*, **191**, 790-798.
- 395 Dunning LT, Savolainen V. (2010) Broad-scale amplification of matK for DNA barcoding plants, a technical note.  
396 *Botanical Journal of the Linnean Society*, **164**(1), 1-9.

- 397 Ebihara A, Nitta JH, Ito M (2010) Molecular species identification with rich floristic sampling: DNA barcoding the  
398       pteridophyte flora of Japan. *PLoS One*, **5**(12), e15136.
- 399 Edgar RC (2004) MUSCLE: multiple sequence alignment with high accuracy and high throughput. *Nucleic Acids*  
400       *Research*, **32**(5), 1792-1797.
- 401 Fahner NA, Shokralla S, Baird DJ, Hajibabaei M (2016) Large-scale monitoring of plants through environmental  
402       DNA metabarcoding of soil: recovery, resolution, and annotation of four DNA markers. *PLoS One*, **11**(6).
- 403 Ferri G, Corradini B, Ferrari F, *et al.* (2015) Forensic botany II, DNA barcode for land plants: Which markers after  
404       the international agreement? *Forensic Science International: Genetics*, **15**, 131-136.
- 405 Forestry Agency (2017) Status of forest resources. *Proportion of forest and planted forest for each prefectures in*  
406       *Japan*. Retrieved from <https://www.rinya.maff.go.jp/j/keikaku/genkyou/h29/1.html>
- 407 Forrest A, Hollingsworth P, Little D, *et al.* (2011) Plant DNA Barcoding using matK, some work in new primer sets  
408       Retrieved from [https://www.slideshare.net/CBOLAdelaide2011/thursday-napier-lg29-1100-hollingsworth-](https://www.slideshare.net/CBOLAdelaide2011/thursday-napier-lg29-1100-hollingsworth-mat-k-primers)  
409       [mat-k-primers](https://www.slideshare.net/CBOLAdelaide2011/thursday-napier-lg29-1100-hollingsworth-mat-k-primers).
- 410 Giguet-Covex C, Pansu J, Arnaud F, *et al.* (2014) Long livestock farming history and human landscape shaping  
411       revealed by lake sediment DNA. *Nature communications*, **5**(1), 1-7.
- 412 Hamilton MB (1999) Four primer pairs for the amplification of chloroplast intergenic regions with intraspecific  
413       variation. *Molecular Ecology*, **8**(3), 521-523.
- 414 Hirose M, Hirose E, Kiyomoto M (2015) Identification of five species of *Dendrodoris* (Mollusca: Nudibranchia)  
415       from Japan, using DNA barcode and larval characters. *Marine Biodiversity*, **45**(4), 769-780.
- 416 Hollingsworth PM (2011) Refining the DNA barcode for land plants. *Proceedings of the National Academy of*  
417       *Sciences*, **108**(49), 19451-19452.
- 418 Ito M, Nagamasu H, Fujii S, *et al.* (2016) GreenList ver. 1.01. Retrieved from <http://www.rdplants.org/gl/>
- 419 Iwatsuki K, Boufford D, Ohba H (1999) Flora of Japan Vol. IIC. Angiospermae Dicotyledoneae Archlamydeae (c).  
420       In: Kodansha, Tokyo.
- 421 Iwatsuki K, Boufford D, Ohba H (2001) Flora of Japan Vol. IIB. Angiospermae Dicotyledoneae Archlamydeae (b).  
422       In: Kodansha, Tokyo.
- 423 Iwatsuki K, Boufford D, Ohba H (2006) Flora of Japan Vol. IIA. Angiospermae Dicotyledoneae Archlamydeae (a).  
424       In: Kodansha, Tokyo.
- 425 Japanese DNA Barcode Database Committee (2014) Japanese DNA Barcode Database (JBOL-DB). Retrieved from  
426       <http://db.jboli.org/?locale=en>
- 427 Kim S, Kim C-B, Min G-S, *et al.* (2012) Korea barcode of life database system (KBOL). *Animal cells and systems*,  
428       **16**(1), 11-19.
- 429 Kraaijeveld K, De Weger LA, Ventayol García M, *et al.* (2015) Efficient and sensitive identification and  
430       quantification of airborne pollen using next - generation DNA sequencing. *Molecular Ecology Resources*,  
431       **15**(1), 8-16.
- 432 Kress WJ, Erickson DL (2007) A two-locus global DNA barcode for land plants: the coding rbcL gene complements  
433       the non-coding trnH-psbA spacer region. *PLoS One*, **2**(6).

- 434 Kress WJ, Erickson DL, Jones FA, *et al.* (2009) Plant DNA barcodes and a community phylogeny of a tropical  
435 forest dynamics plot in Panama. *Proceedings of the National Academy of Sciences*, **106**(44), 18621-18626.
- 436 Kress WJ, García-Robledo C, Uriarte M, Erickson DL (2015) DNA barcodes for ecology, evolution, and  
437 conservation. *Trends in ecology & evolution*, **30**(1), 25-35.
- 438 Kurian A, Dev SA, Sreekumar VB, Muralidharan EM (2020) The low copy nuclear region, RPB2 as a novel DNA  
439 barcode region for species identification in the rattan genus *Calamus* (Arecaceae). *Physiology and  
440 molecular biology of plants : an international journal of functional plant biology*, **26**(9), 1875-1887.
- 441 Liu J, Milne RI, Möller M, *et al.* (2018) Integrating a comprehensive DNA barcode reference library with a global  
442 map of yews (*Taxus* L.) for forensic identification. *Molecular Ecology Resources*, **18**(5), 1115-1131.
- 443 McKinnon GE, Steane DA, Potts BM, Vaillancourt RE (1999) Incongruence between chloroplast and species  
444 phylogenies in *Eucalyptus* subgenus *Monocalyptus* (Myrtaceae). *American Journal of Botany*, **86**(7), 1038-  
445 1046.
- 446 Mittermeier RA, Gil PR, Hoffman M, *et al.* (2004) *Hotspots Revisited: Earth's Biologically Richest and Most  
447 Endangered Terrestrial Ecoregions Cemex*.
- 448 Miya M, Sato Y, Fukunaga T, *et al.* (2015) MiFish, a set of universal PCR primers for metabarcoding environmental  
449 DNA from fishes: detection of more than 230 subtropical marine species. *Royal Society Open Science*,  
450 **2**(7), 150088.
- 451 Nakahama N, Furuta T, Ando H, *et al.* (2021) DNA meta-barcoding revealed that sika deer foraging strategies vary  
452 with season in a forest with degraded understory vegetation. *Forest Ecology and Management*, **484**,  
453 118637.
- 454 Nakazawa F, Uetake J, Suyama Y, *et al.* (2013) DNA analysis for section identification of individual *Pinus* pollen  
455 grains from Belukha glacier, Altai Mountains, Russia. *Environmental Research Letters*, **8**, 014032.
- 456 Nevill PG, Wallace MJ, Miller JT, Krauss SL (2013) DNA barcoding for conservation, seed banking and ecological  
457 restoration of *Acacia* in the Midwest of Western Australia. *Molecular Ecology Resources*, **13**(6), 1033-  
458 1042.
- 459 Nishiumi I (2012) DNA barcoding and species classification of Japanese birds. *Japanese Journal of Ornithology*,  
460 **61**(2), 223-237.
- 461 Oba Y, Ôhira H, Murase Y, Moriyama A, Kumazawa Y (2015) DNA barcoding of Japanese click beetles  
462 (Coleoptera, Elateridae). *PLoS One*, **10**(1), e0116612.
- 463 Pang X, Liu C, Shi L, *et al.* (2012) Utility of the trnH-psbA intergenic spacer region and its combinations as plant  
464 DNA barcodes: a meta-analysis. *PLoS One*, **7**(11).
- 465 Parmentier I, Duminil Jm, Kuzmina M, *et al.* (2013) How effective are DNA barcodes in the identification of  
466 African rainforest trees? *PLoS One*, **8**(4).
- 467 Petit RJ, Csaikl UM, Bordács S, *et al.* (2002) Chloroplast DNA variation in European white oaks: phylogeography  
468 and patterns of diversity based on data from over 2600 populations. *Forest Ecology and Management*,  
469 **156**(1-3), 5-26.

- 470 Poczai P, Hyvönen J (2010) Nuclear ribosomal spacer regions in plant phylogenetics: problems and prospects.  
471 *Molecular biology reports*, **37**(4), 1897-1912.
- 472 Ragupathy S, Newmaster SG, Murugesan M, Balasubramaniam V (2009) DNA barcoding discriminates a new  
473 cryptic grass species revealed in an ethnobotany study by the hill tribes of the Western Ghats in southern  
474 India. *Molecular Ecology Resources*, **9**, 164–171.
- 475 Rambaut A (2020) FigTree v1.4.4. Institute of Evolutionary Biology, University of Edinburgh, Edinburgh.  
476 Retrieved from <http://tree.bio.ed.ac.uk/software/figtree/>
- 477 Ratnasingham S, Hebert PDN (2007) BOLD: The Barcode of Life Data System (<http://www.barcodinglife.org>).  
478 *Molecular Ecology Notes*, **7**(3), 355-364.
- 479 Raupach MJ, Hendrich L, Küchler SM, *et al.* (2014) Building-up of a DNA barcode library for true bugs (Insecta:  
480 Hemiptera: Heteroptera) of Germany reveals taxonomic uncertainties and surprises. *PLoS One*, **9**(9).
- 481 Richardson RT, Lin CH, Sponsler DB, *et al.* (2015) Application of ITS2 metabarcoding to determine the provenance  
482 of pollen collected by honey bees in an agroecosystem. *Applications in plant sciences*, **3**(1), 1400066-1400066.
- 483 Ronquist F, Teslenko M, van der Mark P, *et al.* (2012) MrBayes 3.2: efficient Bayesian phylogenetic inference and  
484 model choice across a large model space. *Syst Biol*, **61**(3), 539-542.
- 485 Saarela JM, Sokoloff PC, Gillespie LJ, Consaul LL, Bull RD (2013) DNA barcoding the Canadian Arctic flora: core  
486 plastid barcodes (rbcL+ matK) for 490 vascular plant species. *PLoS One*, **8**(10).
- 487 Satake Y, Hara H, Watari S, Tominari T (1989) Wild flowers of Japan: Woody plants I, II. Tokyo: Heibonsha Ltd.,  
488 Publishers. In: Japanese.
- 489 Shaw J, Lickey EB, Beck JT, *et al.* (2005) The tortoise and the hare II: relative utility of 21 noncoding chloroplast  
490 DNA sequences for phylogenetic analysis. *American Journal of Botany*, **92**(1), 142-166.
- 491 Sonet G, Jordaens K, Nagy ZT, *et al.* (2013) Adhoc: an R package to calculate ad hoc distance thresholds for DNA  
492 barcoding identification. *ZooKeys*(365), 329-329.
- 493 Steinke D, Vences M, Salzburger W, Meyer A (2005) TaxI: a software tool for DNA barcoding using distance  
494 methods. *Philosophical Transactions of the Royal Society B: Biological Sciences*, **360**(1462), 1975-1980.
- 495 Taberlet P, Coissac E, Pompanon F, Brochmann C, Willerslev E (2012) Towards next-generation biodiversity  
496 assessment using DNA metabarcoding. *Mol Ecol*, **21**(8), 2045-2050.
- 497 Takano A, Fujita H, Kadosaka T, *et al.* (2014) Construction of a DNA database for ticks collected in Japan:  
498 application of molecular identification based on the mitochondrial 16S rDNA gene. *Medical Entomology  
499 and Zoology*, **65**(1), 13-21.
- 500 The Angiosperm Phylogeny Group (2003) An update of the Angiosperm Phylogeny Group classification for the  
501 orders and families of flowering plants: APG II. *Botanical Journal of the Linnean Society*, **141**(4), 399-436.
- 502 The Angiosperm Phylogeny Group (2009) An update of the Angiosperm Phylogeny Group classification for the  
503 orders and families of flowering plants: APG III. *Botanical Journal of the Linnean Society*, **161**(2), 105-  
504 121.
- 505 The Angiosperm Phylogeny Group (2016) An update of the Angiosperm Phylogeny Group classification for the  
506 orders and families of flowering plants: APG IV. *Botanical Journal of the Linnean Society*, **181**(1), 1-20.

- 507 Vences M, Miralles A, Brouillet S, *et al.* (2021) iTaxoTools 0.1: Kickstarting a specimen-based software toolkit for  
508 taxonomists. *BioRxiv*.
- 509 Wagner DB (1992) Nuclear, chloroplast, and mitochondrial DNA polymorphisms as biochemical markers in  
510 population genetic analyses of forest trees. *New Forests*, **6**(1-4), 373-390.
- 511 Watano Y, Kanai A, Tani N (2004) Genetic structure of hybrid zones between *Pinus pumila* and *P. parviflora* var.  
512 *pentaphylla* (Pinaceae) revealed by molecular hybrid index analysis. *American Journal of Botany*, **91**(1),  
513 65-72.
- 514 Wilson JJ, Rougerie R, Schonfeld J, *et al.* (2011) When species matches are unavailable are DNA barcodes correctly  
515 assigned to higher taxa? An assessment using sphingid moths. *BMC Ecology*, **11**(1), 18-18.
- 516 Wolfe KH, Li W-H, Sharp PM (1987) Rates of nucleotide substitution vary greatly among plant mitochondrial,  
517 chloroplast, and nuclear DNAs. *Proceedings of the National Academy of Sciences*, **84**(24), 9054-9058.
- 518 Yamamoto S, Masuda R, Sato Y, *et al.* (2017) Environmental DNA metabarcoding reveals local fish communities in  
519 a species-rich coastal sea. *Scientific Reports*, **7**(1), 40368.
- 520 Yamamoto S, Minami K, Fukaya K, *et al.* (2016) Environmental DNA as a ‘snapshot’ of fish distribution: A case  
521 study of Japanese jack mackerel in Maizuru Bay, Sea of Japan. *PLoS One*, **11**(3), e0149786.
- 522 Yamaura Y, Oka H, Taki H, Ozaki K, Tanaka H (2012) Sustainable management of planted landscapes: lessons  
523 from Japan. *Biodiversity and Conservation*, **21**(12), 3107-3129.
- 524 Yao H, Song J-Y, Ma X-Y, *et al.* (2009) Identification of *Dendrobium* species by a candidate DNA barcode  
525 sequence: the chloroplast psbA-trnH intergenic region. *Planta medica*, **75**(06), 667-669.
- 526 Yoccoz NG, Bråthen KA, Gielly L, *et al.* (2012) DNA from soil mirrors plant taxonomic and growth form diversity.  
527 *Mol Ecol*, **21**(15), 3647-3655.
- 528 Yonekura K, Kajita T (2003) BG Plants: Japanese name–scientific name index (YList). Retrieved from  
529 <http://ylist.info>
- 530
- 531

532 Table 1 Details of the primer DNA sequences for each of the three chloroplast barcode regions.

| Region                    | Primer type                        | Primer name     | Genbank ID                              | Direction                          | Sequence                           | TA(°C) | Reference                      |
|---------------------------|------------------------------------|-----------------|-----------------------------------------|------------------------------------|------------------------------------|--------|--------------------------------|
| <i>rbcL</i>               | Universal                          | rbcLa-F         | -                                       | Forward                            | ATG TCA CCA CAA ACA GAG ACT AAA GC | 55     | CBOL Plant Working Group, 2009 |
|                           |                                    | NTrbcL-626L24   |                                         | Reverse                            | GAT CTC TCC AAC GCA TAA ATG GTT    |        |                                |
| <i>trnH-psbA</i>          | Universal                          | NT55U           | Z00044,<br>S54304,<br>X15901,<br>D17510 | Forward                            | CCT TGA TCC ACT TGG CTA C          | 55     | c                              |
|                           |                                    | PT119680L21     |                                         | Reverse                            | GGA AGT TAT GCA CGA ACG TAA        |        |                                |
| <i>matK</i>               | Universal                          | matK_Kim_f      | -                                       | Forward                            | CGTACAGTACTTTTGTGTTTACGAG          | 55     | CBOL Plant Working Group, 2009 |
|                           |                                    | HydmatK1041L    | AB038178                                | Reverse                            | CCCATCCATCTGGAAATCTTGGTTC          |        |                                |
|                           | Universal,<br>1st PCR <sup>a</sup> | matK-Xf         | -                                       | Forward                            | TAA TTT ACG ATC AAT TCA TTC        | 46     | Ragupathy et al., 2009         |
|                           |                                    | MALPR1          | -                                       | Reverse                            | ACA AGA AAG TCG AAG TAT            |        |                                |
|                           | Universal,<br>2nd PCR <sup>a</sup> | matK472F1       | -                                       | Forward                            | CCC RTY CAT CTG GAA ATC TTG GTT C  | 50     | Yu et al., 2011                |
|                           |                                    | matK1248R1      | -                                       | Reverse                            | GCT RTR ATA ATG AGA AAG ATT TCT GC |        |                                |
|                           | Pinales, Cupressales <sup>b</sup>  | CJmatK175U      | AP009377                                | Forward                            | CCG AAC TAC ACG TAT CGT ACT T      | 50     | c                              |
|                           |                                    | CJmatK1058L     |                                         | Reverse                            | CGA GTA CCC TAC TCT ATT CAT CC     |        |                                |
|                           | Podocarpaceae <sup>b</sup>         | Thujopsis_matKF | AB030134.1                              | Forward                            | ACT GTA GTA ATG AAA AAG ATT TAT CC | 50     | c                              |
|                           |                                    | Thujopsis_matKR |                                         | Reverse                            | TCA ATT CAT CCG GAA ATT TTG GTT    |        |                                |
|                           | Ranunculales <sup>b</sup>          | Anemone_matKF   | AB110530.1                              | Forward                            | GCT GTA ATA ATG CGA AAG ATT TCG GC | 50     | c                              |
|                           |                                    | Anemone_matKR   |                                         | Reverse                            | CCT ATC CAT CTG GAA CTA TTG GTT    |        |                                |
| Rosales <sup>b</sup>      | Sorbaria_matKF                     | GU363761.1      | Forward                                 | ACT GTA ATA ATG AGA AAG ATT TCT GC | 50                                 | c      |                                |
|                           | Sorbaria_matKR                     |                 | Reverse                                 | CCC ATT CAT CTG GAA ATC TTG GTT    |                                    |        |                                |
| Malpighiales <sup>b</sup> | Croton_matKF                       | AB233773.1      | Forward                                 | ACT ATA ATA ATG AGA AAG CTT TCT GC | 50                                 | c      |                                |
|                           | Croton_matKR                       |                 | Reverse                                 | CCC ATC CAT ATA GAA AAA TTA GTC    |                                    |        |                                |

|                            |                      |            |         |                                    |    |              |
|----------------------------|----------------------|------------|---------|------------------------------------|----|--------------|
| Anacardiaceae <sup>b</sup> | Choerospondias_matKF | HQ427341.1 | Forward | GCT GTG ATA ATG AGA AAG ATT TCT GC | 50 | <sup>c</sup> |
|                            | Choerospondias_matKR |            | Reverse | CCC ATT CGC CCG GAA ATC TTG GTT    |    | <sup>c</sup> |
| Sapindales <sup>b</sup>    | Toddalia_matKF       | FJ716738.1 | Forward | GCT GTG ATA ATG AGA AAG ATT TCT GC | 50 | <sup>c</sup> |
|                            | Toddalia_matKR       |            | Reverse | CCC ATT TGT CCC GAA ATC TTG GTT    |    | <sup>c</sup> |
| Ericaceae <sup>b</sup>     | Andromeda_matKF      | JF801293.1 | Forward | GCT ATA ATA ATG AGA AAG ATT TCT AT | 50 | <sup>c</sup> |
|                            | Andromeda_matKR      |            | Reverse | CCC GTC CAT CTG GAA ATC TTG GTT    |    | <sup>c</sup> |

533

534 <sup>a</sup> Two step PCR was carried out in matK according to Forrest *et al.* (2011)535 <sup>b</sup> Tageted primers in matK536 <sup>c</sup> Primers designed for use in this study.



537 Table 2 A summary of the representation of genera and species of each plant order native to  
538 Japan included in the Japanese woody plants DNA barcoding database.

| Order                      | No. of genera in Japan<br>(% sampled) <sup>a</sup> |        | No. of species in Japan<br>(% sampled) <sup>a</sup> |         | No. taxa<br>sampled | No.<br>samples |
|----------------------------|----------------------------------------------------|--------|-----------------------------------------------------|---------|---------------------|----------------|
| Cycadales                  | 1                                                  | (100)  | 1                                                   | (100)   | 1                   | 2              |
| Pinales                    | 6                                                  | (83)   | 22                                                  | (81.8)  | 20                  | 86             |
| Araucariales               | 2                                                  | (100)  | 2                                                   | (100)   | 2                   | 11             |
| Cupressales                | 9                                                  | (100)  | 14                                                  | (100)   | 19                  | 101            |
| Pandanales                 | 2                                                  | (50)   | 4                                                   | (50)    | 3                   | 6              |
| Liliales <sup>b</sup>      | -                                                  | -      | -                                                   | -       | 4                   | 11             |
| Arecales                   | 6                                                  | (50)   | 6                                                   | (50)    | 4                   | 10             |
| Poales                     | 6                                                  | (0)    | 15                                                  | (0)     | 0                   | 0              |
| Ranunculales               | 6                                                  | (100)  | 10                                                  | (100)   | 20                  | 111            |
| Proteales                  | 3                                                  | (66.7) | 7                                                   | (71.4)  | 5                   | 42             |
| Trochodendrales            | 1                                                  | (100)  | 1                                                   | (100)   | 1                   | 10             |
| Buxales                    | 1                                                  | (100)  | 2                                                   | (100)   | 3                   | 4              |
| Saxifragales               | 9                                                  | (88.9) | 24                                                  | (66.7)  | 20                  | 115            |
| Vitales                    | 4                                                  | (75)   | 10                                                  | (60)    | 9                   | 77             |
| Austrobaileyales           | 3                                                  | (100)  | 4                                                   | (100)   | 5                   | 43             |
| Fabales                    | 27                                                 | (40.7) | 43                                                  | (37.2)  | 25                  | 144            |
| Rosales                    | 42                                                 | (88.1) | 172                                                 | (73.8)  | 155                 | 1014           |
| Fagales                    | 14                                                 | (100)  | 56                                                  | (94)    | 60                  | 555            |
| Cucurbitales               | 1                                                  | (100)  | 1                                                   | (100)   | 1                   | 6              |
| Celastrales                | 5                                                  | (100)  | 27                                                  | (74.1)  | 23                  | 169            |
| Oxalidales                 | 1                                                  | (100)  | 4                                                   | (75)    | 3                   | 20             |
| Malpighiales               | 28                                                 | (60.7) | 68                                                  | (60.3)  | 43                  | 215            |
| Myrtales                   | 11                                                 | (63.6) | 16                                                  | (56.25) | 10                  | 23             |
| Crossosomatales            | 4                                                  | (100)  | 4                                                   | (100)   | 8                   | 93             |
| Chloranthales <sup>b</sup> | -                                                  | -      | -                                                   | -       | 1                   | 3              |
| Sapindales                 | 20                                                 | (90)   | 61                                                  | (86.9)  | 68                  | 629            |
| Malvales                   | 14                                                 | (42.9) | 31                                                  | (51.6)  | 17                  | 67             |
| Brassicales                | 1                                                  | (100)  | 1                                                   | (100)   | 1                   | 2              |

|                        |     |        |      |        |     |      |
|------------------------|-----|--------|------|--------|-----|------|
| Santalales             | 7   | (85.7) | 9    | (77.8) | 7   | 37   |
| Caryophyllales         | 1   | (100)  | 3    | (33.3) | 1   | 2    |
| Cornales               | 8   | (100)  | 28   | (89.3) | 28  | 363  |
| Ericales               | 31  | (90.3) | 159  | (74.2) | 146 | 844  |
| Icacinales             | 2   | (0)    | 2    | (0)    | 0   | 0    |
| Garryales              | 1   | (100)  | 1    | (100)  | 3   | 25   |
| Piperales <sup>b</sup> | -   | -      | -    | -      | 2   | 8    |
| Gentianales            | 25  | (88)   | 47   | (74.5) | 45  | 161  |
| Boraginales            | 3   | (66.7) | 7    | (28.6) | 2   | 6    |
| Solanales              | 3   | (33.3) | 6    | (16.7) | 1   | 2    |
| Lamiales               | 15  | (80)   | 49   | (75.5) | 45  | 265  |
| Aquifoliales           | 2   | (100)  | 24   | (91.7) | 28  | 171  |
| Asterales              | 5   | (80)   | 6    | (66.7) | 7   | 21   |
| Dipsacales             | 7   | (100)  | 51   | (68.6) | 45  | 274  |
| Apiales                | 11  | (100)  | 20   | (85)   | 24  | 161  |
| Magnoliales            | 2   | (50)   | 7    | (85.7) | 8   | 54   |
| Laurales               | 10  | (70)   | 28   | (82.1) | 30  | 253  |
| Alismatales            | 1   | (0)    | 1    | (0)    | 0   | 0    |
| Total                  | 361 | (77.3) | 1054 | (72.2) | 953 | 6216 |

539

540 <sup>a</sup> The percentage of genera and species native to Japan included in the database were calculated  
 541 based on Satake *et al.* (1989).

542 <sup>b</sup> denotes families that are not included in Satake *et al.* (1989) and, therefore, the percentage of  
 543 genera and species represented was not calculated. However, for these orders the number of taxa  
 544 and species sampled are provided.

545

546 Table 3 Sampling rate for each region in Japan

547

| Region           | No. of species | No. of species sampled | Sampling rate (%) |
|------------------|----------------|------------------------|-------------------|
| Hokkaido         | 217            | 193                    | 88.9              |
| Honshu           | 664            | 560                    | 84.3              |
| Shikoku          | 495            | 441                    | 89.1              |
| Kyushu           | 527            | 454                    | 86.1              |
| Nansei Islands   | 420            | 266                    | 63.3              |
| Ogsawara Islands | 88             | 76                     | 86.4              |

548

549

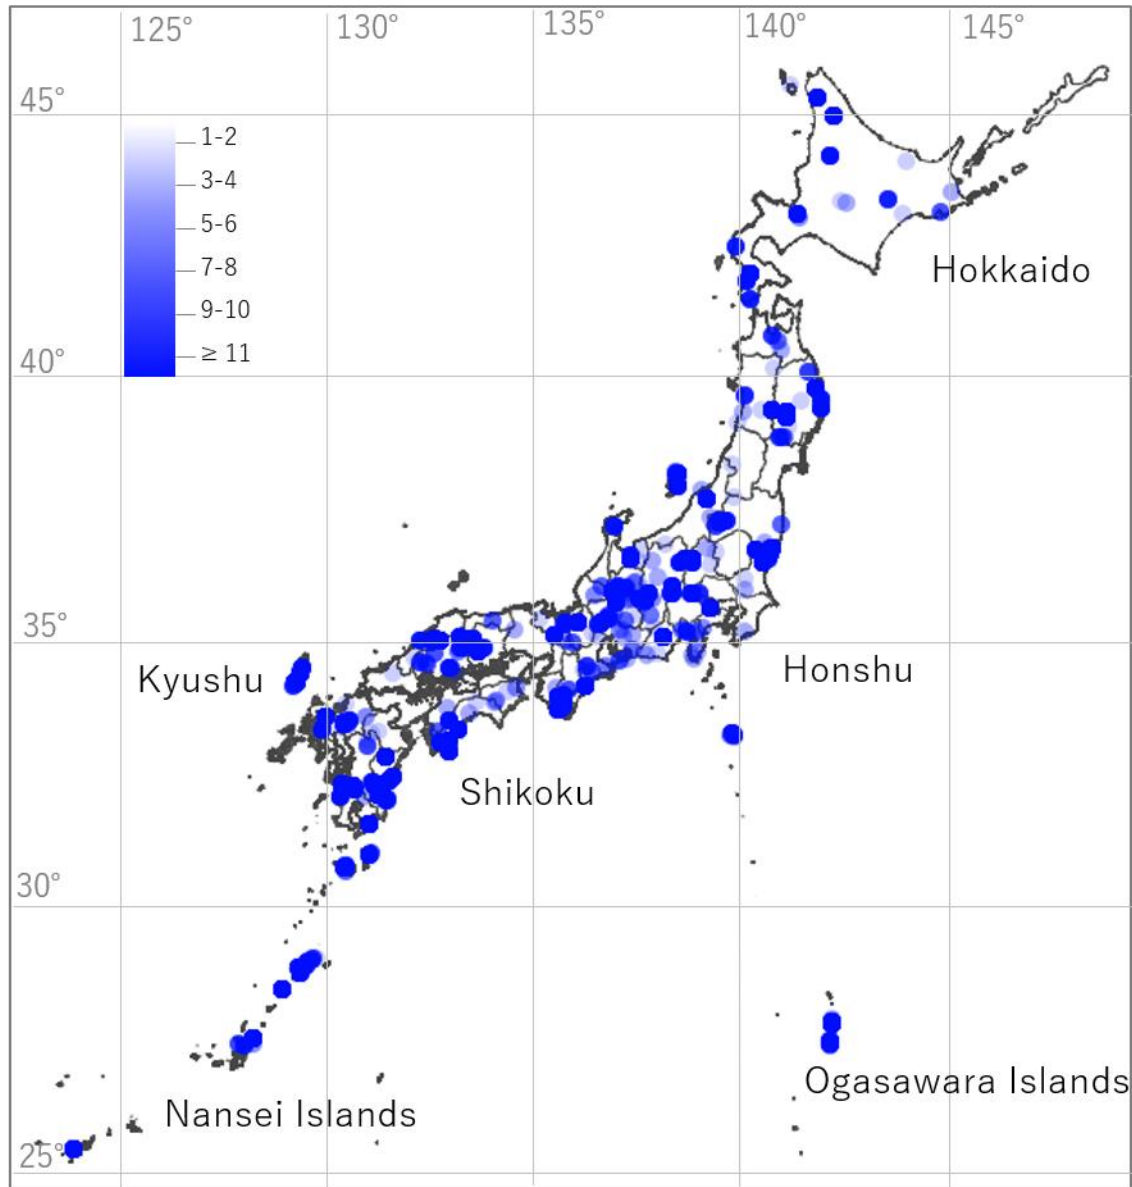

550

551 Figure 1 Location of all 223 sampling sites used to collect woody plants for the barcoding  
552 database. Opacity of the circles represent the number of samples per site ranging from 1 to 209  
553 (average=24.9).

554

(a) Overall sequence success

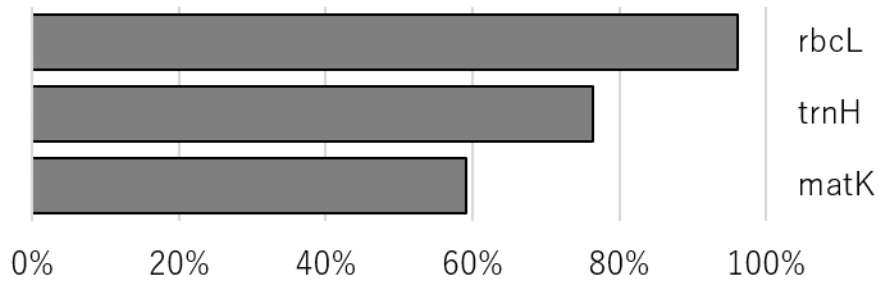

(b) Overall Identification

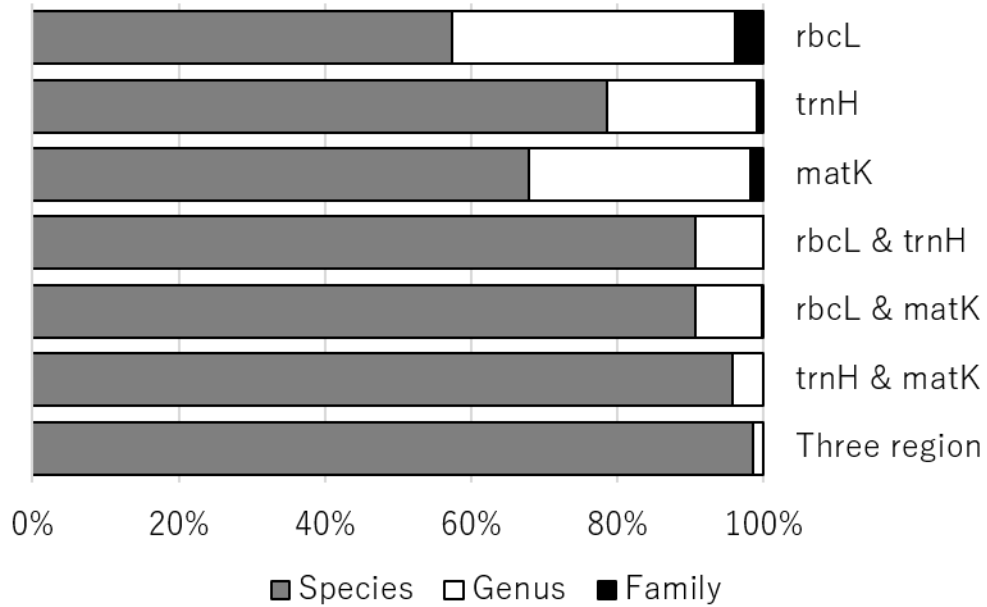

555

556 Figure 2 The overall level of sequencing success rate for each barcode region (a) and taxonomic  
557 identification rate (at the species, genus or family level) for each individual barcode region,  
558 barcode pair and all three regions (b).

559

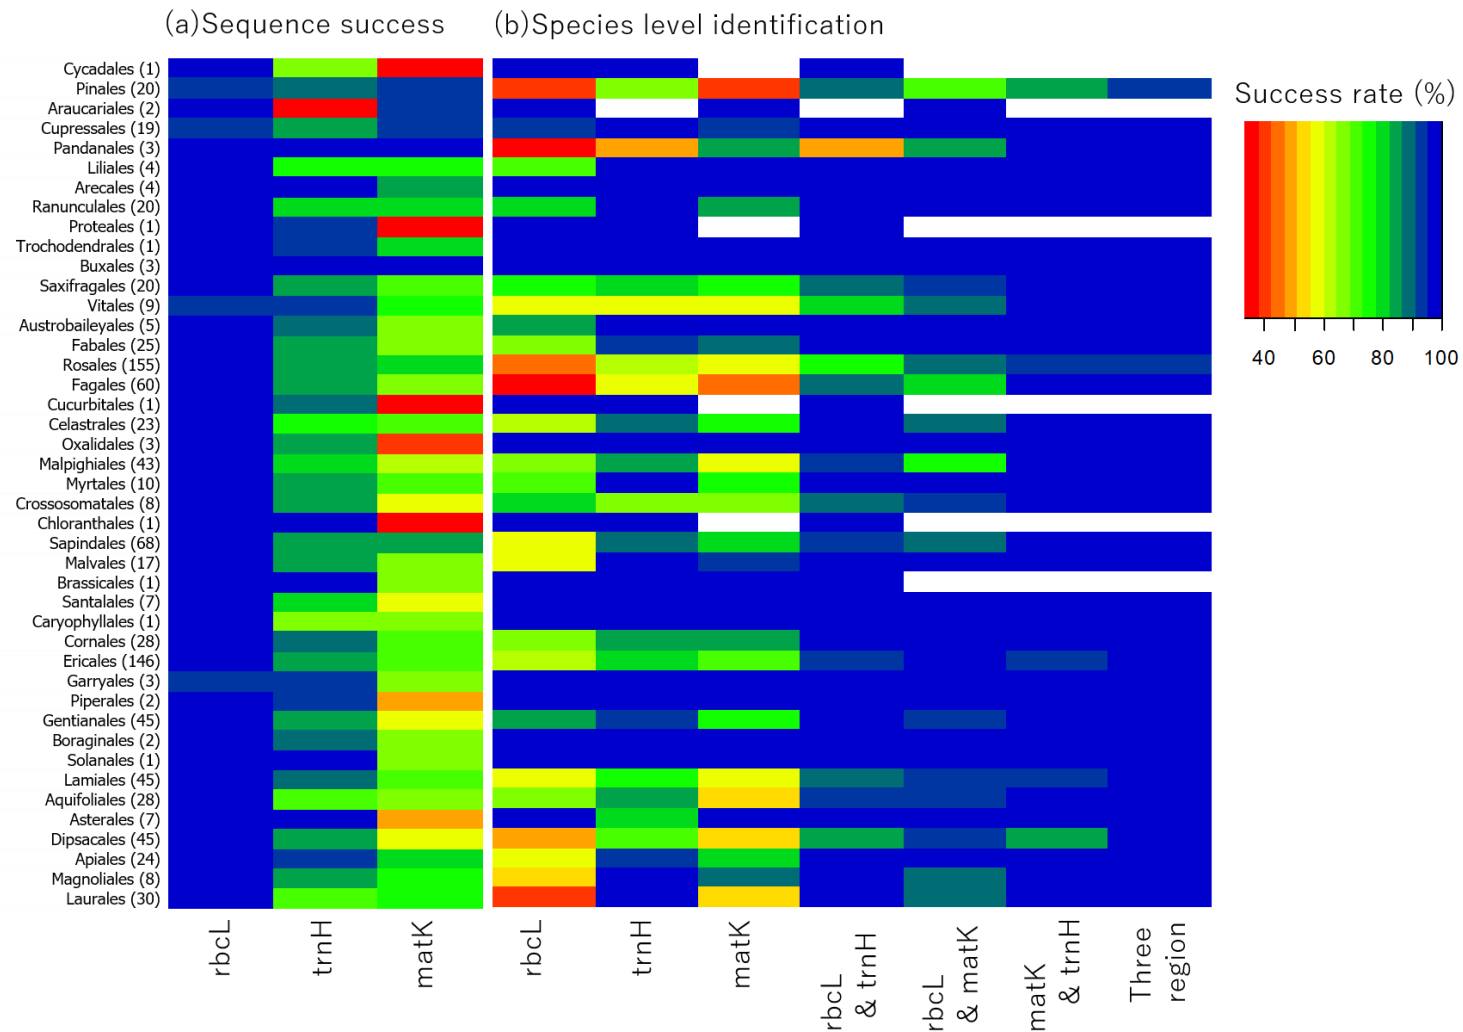

560

561 Figure 3 Sequencing success rate for each barcode region and species level identification rate for each barcode region, barcode pair  
 562 and all three regions for each order. Number of taxa represented by an order is shown in brackets. White blanks show no sequence  
 563 region available at the order.

564

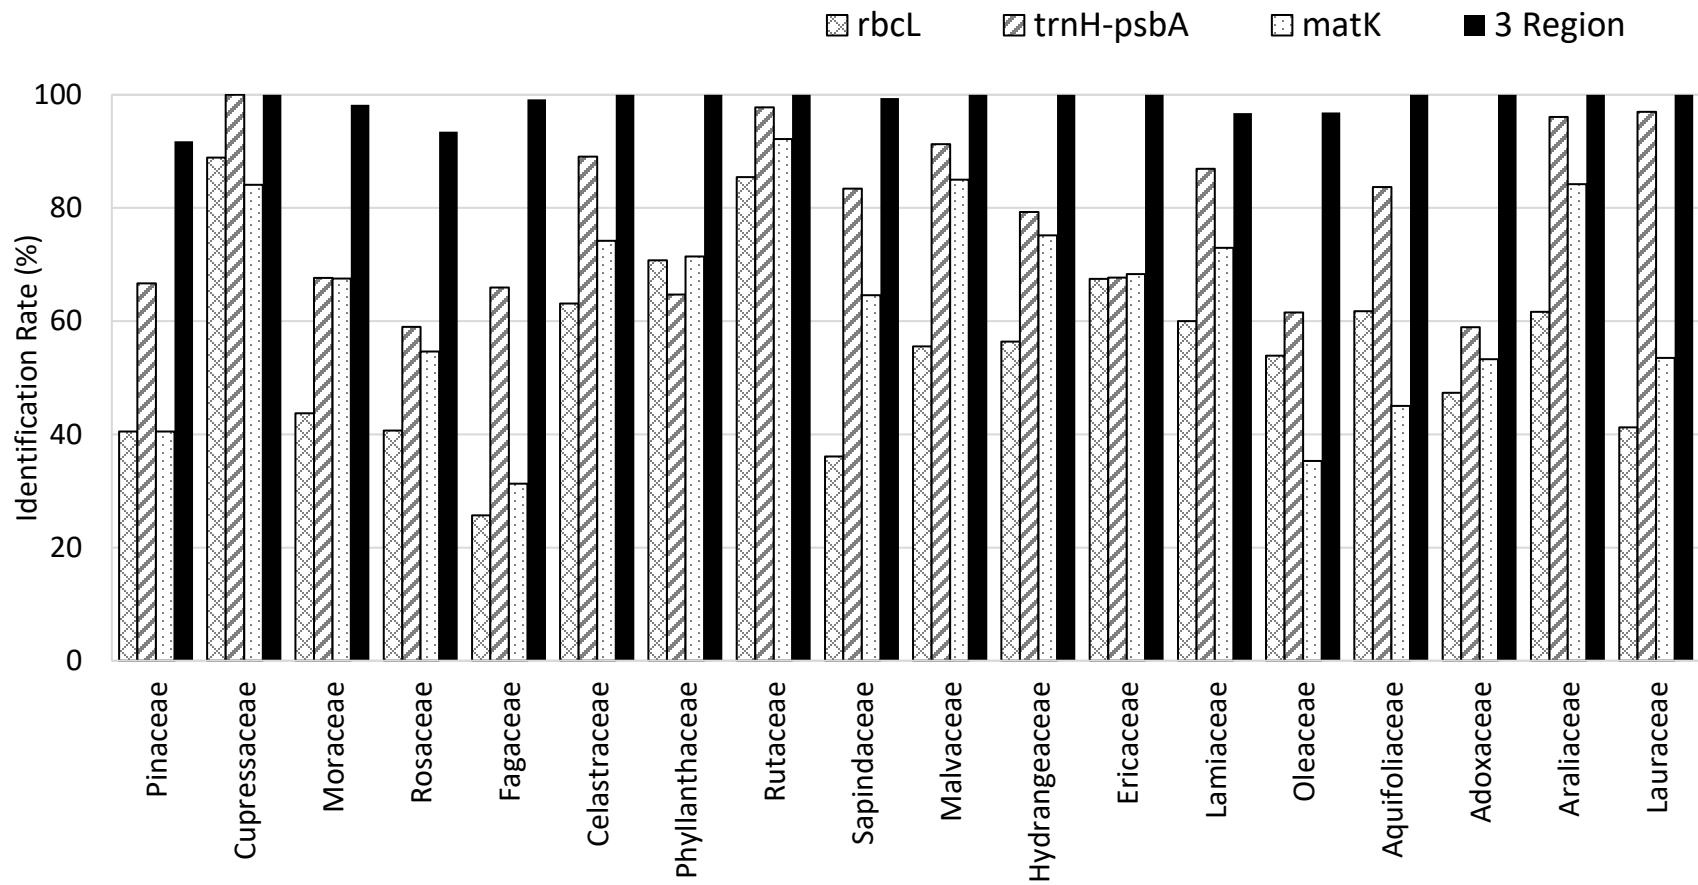

565

566

567

Figure 4 The species level identification rate for 18 selected plant families for which there are over 10 species in Japan and over 70% of species were sampled and over 50% sequence success for each three regions.

568

569

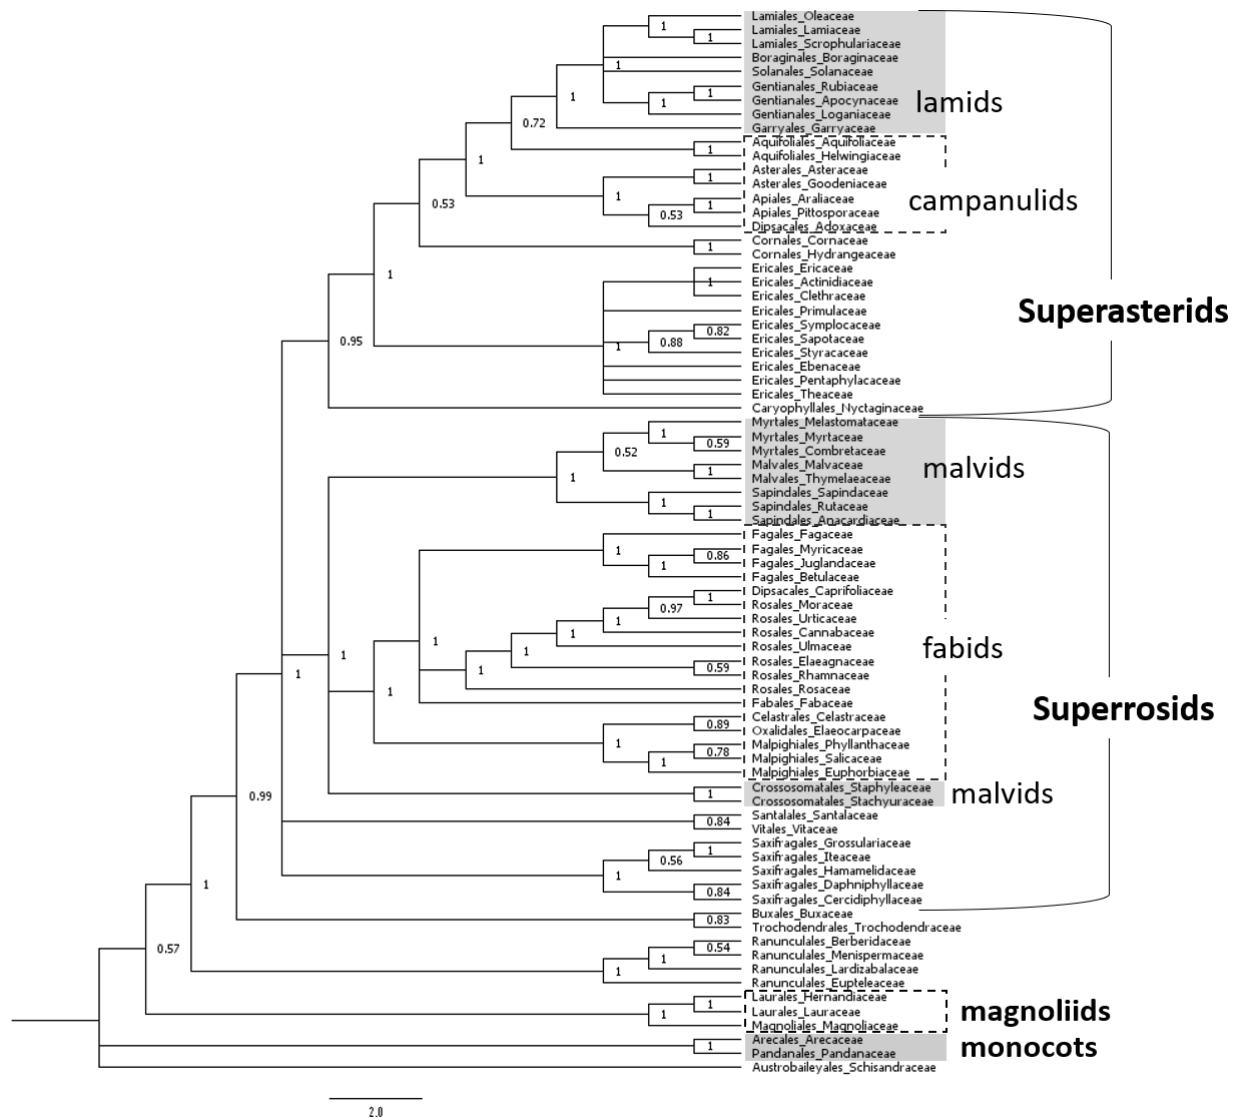

570

571 Figure 5 The phylogenetic tree of Japanese woody plants using all three barcode fragments (rbcL  
572 + trnH-psbA + matK).

573

574



575 Supplementary tables

576

577 Supplementary table 1 List of samples used in this study

578 Can be downloaded from <https://doi.org/10.6084/m9.figshare.16947391>

579

580 Supplementary table 2 Sequencing success rates of matK using two-step PCR and order specific  
581 primers

582

| Order        | Family          | Primer name         | Sequence success rate for two-step PCR (%) | Sequence success rate for order specific primers (%) |
|--------------|-----------------|---------------------|--------------------------------------------|------------------------------------------------------|
| Pinales      | Pinaceae        | CJmatK              | 0.00                                       | 89.6                                                 |
| Araucariales | Podocarpaceae   | Thujopsis_matK      | 0.00                                       | 93.3                                                 |
| Cupressales  | Cupressaceae    | CJmatK              | 0.00                                       | 94.9                                                 |
|              | Sciadopityaceae | CJmatK              | 0.00                                       | 100.0                                                |
|              | Taxaceae        | CJmatK              | 0.00                                       | 92.9                                                 |
| Ranunculales | Berberidaceae   | Anemone_matK        | 44.44                                      | 52.6                                                 |
|              | Lardizabalaceae | Anemone_matK        | 64.71                                      | 100.0                                                |
|              | Menispermaceae  | Anemone_matK        | 69.57                                      | 19.0                                                 |
|              | Ranunculaceae   | Anemone_matK        | 53.33                                      | 96.6                                                 |
| Rosales      | Rosaceae        | Sorbaria_matK       | 34.33                                      | 93.1                                                 |
| Malpighiales | Euphorbiaceae   | Croton_matK         | 14.63                                      | 40.8                                                 |
| Sapindales   | Anacardiaceae   | Choerospondias_matK | 42.86                                      | 93.0                                                 |
|              | Meliaceae       | Toddalia_matK       | 0.00                                       | 100.0                                                |
|              | Rutaceae        | Toddalia_matK       | 17.48                                      | 94.8                                                 |
|              | Simaroubaceae   | Toddalia_matK       | 0.00                                       | 100.0                                                |
| Ericales     | Ericaceae       | Andromeda_matK      | 37.54                                      | 87.7                                                 |

583

584

585 Supplementary table 3 A summary of the representation of genera and species, sequence success  
586 of each barcode region, and identification rate at the speceis, genus and family level for each  
587 plant family native to Japan included in the Japanese Woody Plant DNA Barcoding Database.

588 Can be downloaded from <https://doi.org/10.6084/m9.figshare.16947391>

589
